# Supplementary material for: Preparation of high-quality next-generation sequencing libraries from picogram quantities of target DNA
Source: HighWire-hosted journal article supplement (doi:10.1101/gr.124016.111), 2011-11-16
Supplement: Final_Supplemental_material_.pdf [file Final_Supplemental_material_.pdf]

**Supplementary Figure-1 Nicholas Parkinson.**

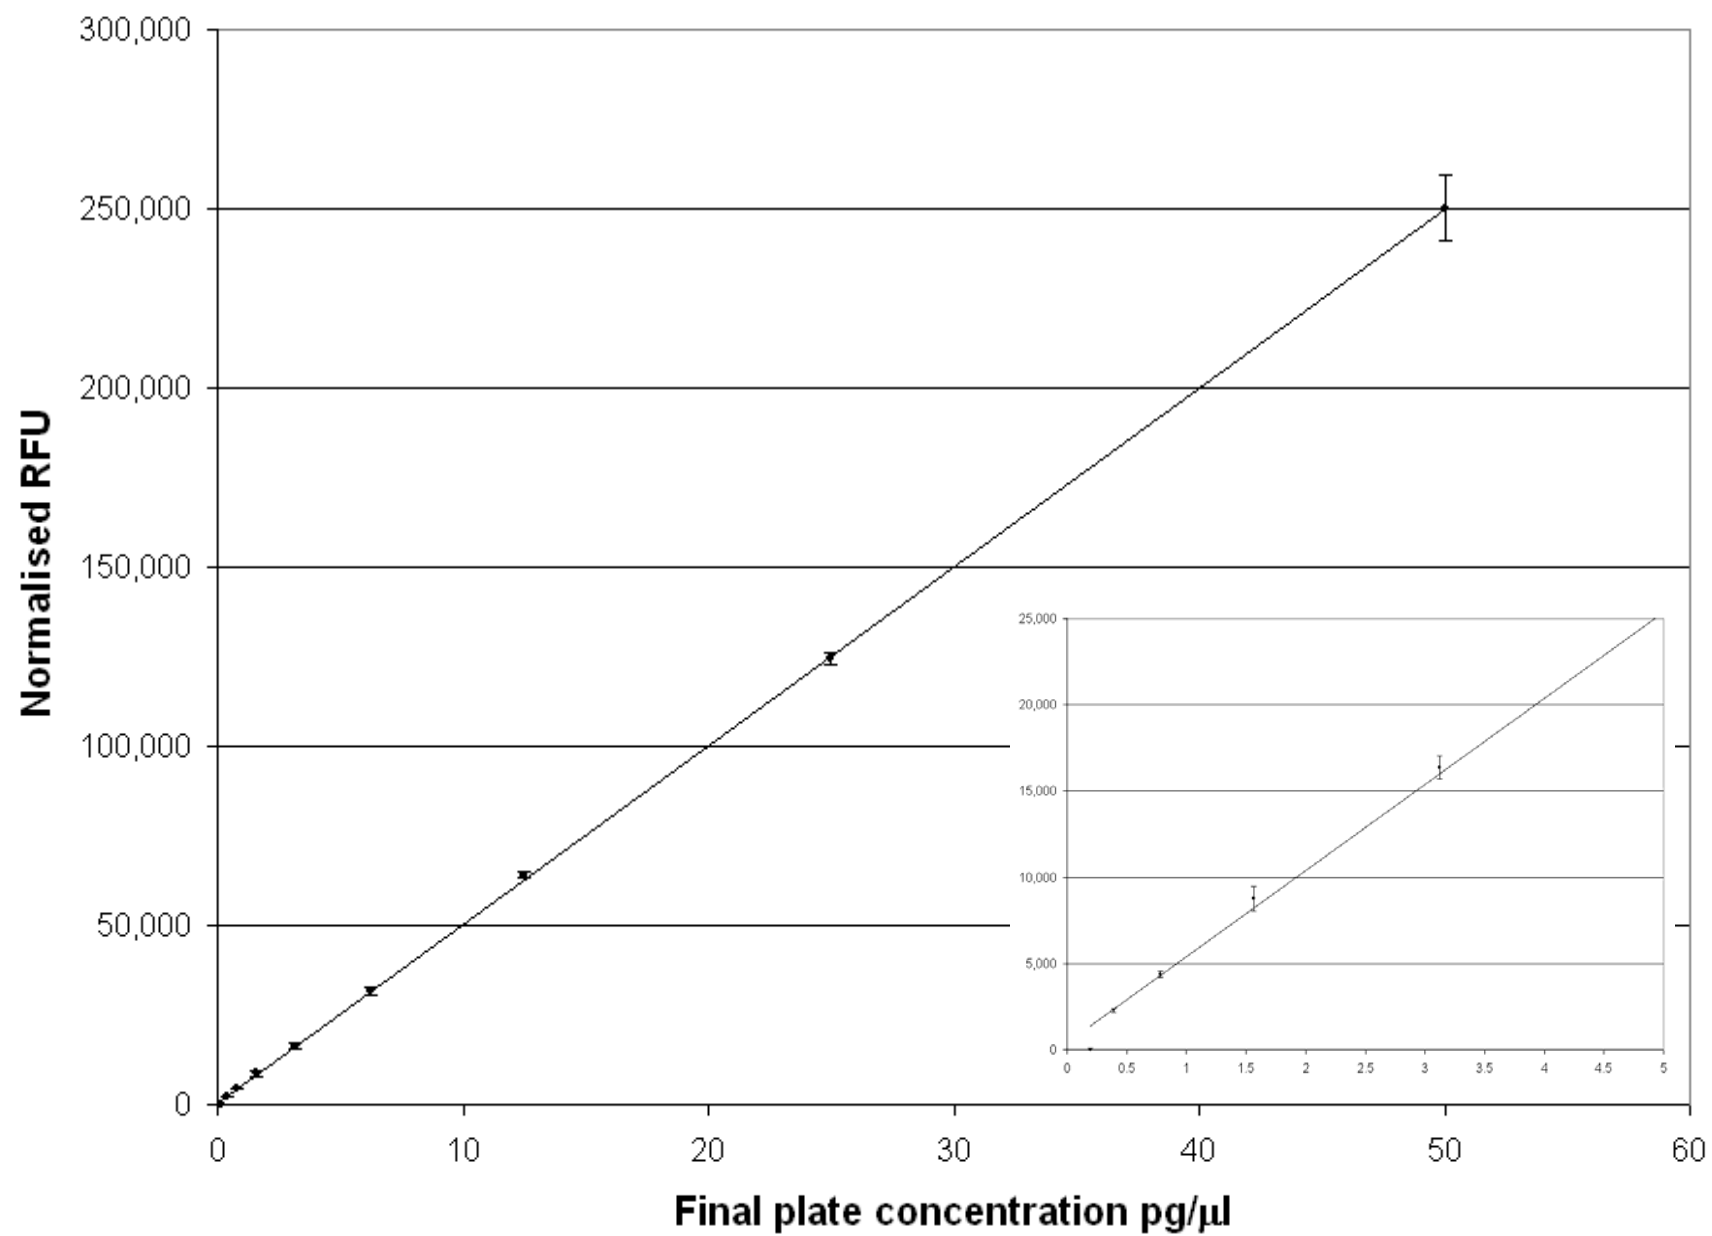

Supplemental Figure-2 Nicholas Parkinson.

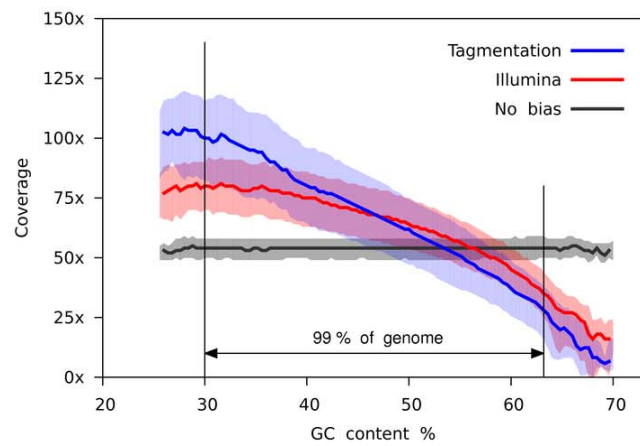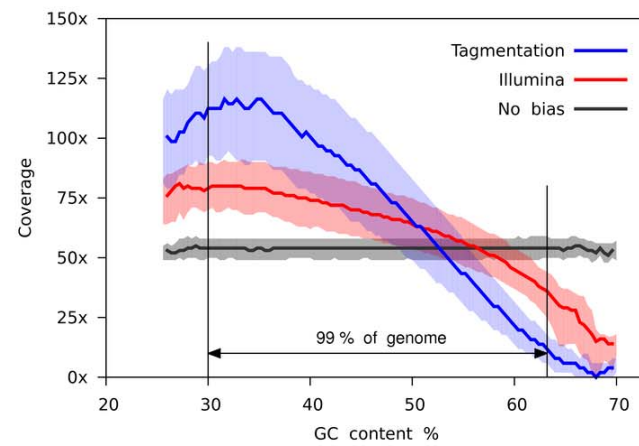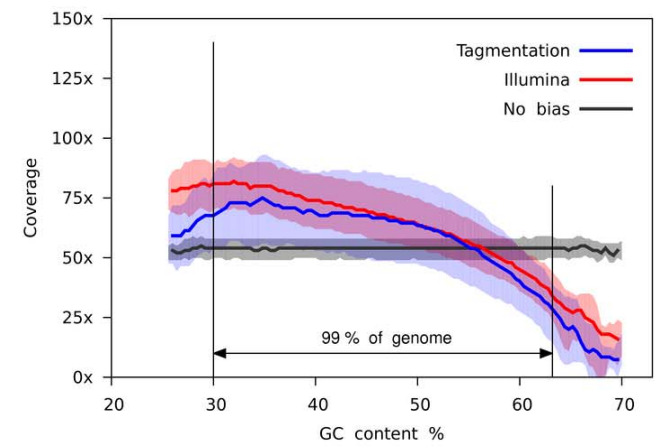

**Supplemental Table-1 Nicholas Parkinson.**

| Method                                | Illumina non-barcoded (n=4)         | Illumina barcoded (n=7)             | Tagmentation (n=6)                   |
|---------------------------------------|-------------------------------------|-------------------------------------|--------------------------------------|
| Gross flowcell lane yield             | 54,578,916 +/- 5,250,157            | 60,126,589 +/- 4,289,408            | 63,889,183 +/- 2,265,128             |
| Flowcell lane reads >phred 20         | 33,977,386 +/- 1,627,427<br>(62.2%) | 39,890,981 +/- 9,989,032<br>(66.3%) | 42,881,429 +/- 10,065,397<br>(67.2%) |
| >phred 20 reads with correct barcodes | N/A                                 | 37,625,293 +/- 9,908,756<br>(62.6%) | 41,909,177 +/- 9,839,476<br>(65.6%)  |

Supplemental Table-2 Nicholas Parkinson.

| Barcode        | PE Adapter | Sequence                                               |
|----------------|------------|--------------------------------------------------------|
| <b>CAG</b>     | 1          | /5Phos/AGATCGGAAGAGCGGTTCAGCAGGAATGCCGAG               |
|                | 2          | ACACTCTTTCCCTACACGACGCTCTTCCGATCT <b>C*A</b>           |
| <b>TCAG</b>    | 1          | /5Phos/ <b>A</b> AGATCGGAAGAGCGGTTCAGCAGGAATGCCGAG     |
|                | 2          | ACACTCTTTCCCTACACGACGCTCTTCCGATCT <b>TC*A</b>          |
| <b>GTCAG</b>   | 1          | /5Phos/ <b>AC</b> AGATCGGAAGAGCGGTTCAGCAGGAATGCCGAG    |
|                | 2          | ACACTCTTTCCCTACACGACGCTCTTCCGATCT <b>GTC*A</b>         |
| <b>AGTCAG</b>  | 1          | /5Phos/ <b>ACTA</b> GATCGGAAGAGCGGTTCAGCAGGAATGCCGAG   |
|                | 2          | ACACTCTTTCCCTACACGACGCTCTTCCGATCT <b>AGTC*A</b>        |
| <b>TAGTCAG</b> | 1          | /5Phos/ <b>ACTA</b> AAGATCGGAAGAGCGGTTCAGCAGGAATGCCGAG |
|                | 2          | ACACTCTTTCCCTACACGACGCTCTTCCGATCT <b>TAGTC*A</b>       |

**Supplemental Table-3 Nicholas Parkinson.**

| Target DNA                                                             | <i>E. coli</i> gDNA  |                      |                      |                      |                      |                      |                      |
|------------------------------------------------------------------------|----------------------|----------------------|----------------------|----------------------|----------------------|----------------------|----------------------|
| Method                                                                 | Illumina             | Tagmentation         |                      |                      |                      |                      |                      |
| DNA input                                                              | 1µg                  | <i>AcuI</i>          | <i>BsgI/BpmI</i> *   | Blended from all 4   | <i>AcuI</i>          | <i>BsgI/BpmI</i>     | Blended from all 4   |
|                                                                        |                      | 1ng                  | 2x 1ng               | 4x 1ng               | 100pg                | 2x 100pg             | 4x 100pg             |
| Demultiplexed Reads >Phred 20                                          | 3,932,654<br>(100%)  | 2,007,577<br>(100%)  | 3,187,700<br>(100%)  | 5,190,980<br>(100%)  | 2,598,467<br>(100%)  | 2,594,089<br>(100%)  | 2,679,960<br>(100%)  |
| Uniquely Mapped read pairs                                             | 3,831,507<br>(97.4%) | 1,947,625<br>(97.0%) | 3,083,131<br>(96.7%) | 5,025,947<br>(96.8%) | 2,532,052<br>(97.4%) | 2,521,795<br>(97.2%) | 2,523,912<br>(94.2%) |
| Genome Alignment Phred Q >150-150                                      | 3,814,547<br>(97.0%) | 1,939,653<br>(96.6%) | 3,068,900<br>(96.3%) | 5,002,152<br>(96.4%) | 2,517,717<br>(96.9%) | 2,507,854<br>(96.7%) | 2,509,754<br>(93.6%) |
| Read pairs with 98 <sup>th</sup> percentile of library fragment length | 3,813,816<br>(97.0%) | 1,933,513<br>(96.3%) | 3,054,574<br>(95.8%) | 4,989,823<br>(96.1%) | 2,494,242<br>(96.0%) | 2,484,887<br>(95.8%) | 2,485,272<br>(92.7%) |
| Non-Redundant read pairs                                               | 3,770,853<br>(95.9%) | 1,707,743<br>(85.1%) | 2,608,202<br>(81.8%) | 4,064,141<br>(78.3%) | 1,911,917<br>(73.6%) | 2,077,998<br>(80.1%) | 2,087,567<br>(77.9%) |
| Library Diversity (% unique fragments)                                 | 98.9%                | 88.3%                | 85.4%                | 81.4%                | 76.7%                | 83.6%                | 84.0%                |

**Supplemental Table-4 Nicholas Parkinson.**

| Target DNA                                                    | <i>E. coli</i> gDNA |              |                    |                       |             |                  |                       |
|---------------------------------------------------------------|---------------------|--------------|--------------------|-----------------------|-------------|------------------|-----------------------|
| Method                                                        | Illumina            | Tagmentation |                    |                       |             |                  |                       |
| DNA Input                                                     | 1µg                 | <i>AcuI</i>  | <i>BsgI/BpmI</i> * | Blended from<br>all 4 | <i>AcuI</i> | <i>BsgI/BpmI</i> | Blended from<br>all 4 |
|                                                               |                     | 1ng          | 2x 1ng             | 4x 1ng                | 100pg       | 2x 100pg         | 4x 100pg              |
| % Genome sequenced at coverage ≥1x                            | 98%                 | 96%          | 96%                | 98%                   | 96%         | 97%              | 97%                   |
| % Genome sequenced at coverage ≥5x                            | 97%                 | 89%          | 90%                | 93%                   | 89%         | 93%              | 93%                   |
| % Genome sequenced at coverage ≥10x                           | 91%                 | 79%          | 79%                | 80%                   | 74%         | 79%              | 79%                   |
| Median genome coverage                                        | 19x                 | 18x          | 18x                | 18x                   | 16x         | 17x              | 17x                   |
| Coverage dispersion (IQR 25 <sup>th</sup> -75 <sup>th</sup> ) | 14x - 24x           | 11x - 26x    | 11x - 26x          | 12x - 25x             | 9x-26x      | 11x-26x          | 11x-26x               |
